# Supplementary material for: New-onset psychosis following COVID-19 vaccination: a systematic review
Source: PubMed Central journal article supplement (PMC11046000; doi:10.3389/fpsyt.2024.1360338), 2024-04-12
Supplement: DataSheet_1.pdf [file DataSheet_1.pdf]

**Supplementary Table 1.** JBI Critical Appraisal Checklist for Case Reports

| Reference                                  | Q1  | Q2  | Q3  | Q4  | Q5  | Q6  | Q7  | Q8  | Total (%) | ROB      |
|--------------------------------------------|-----|-----|-----|-----|-----|-----|-----|-----|-----------|----------|
| Flannery et al., 2021                      | No  | Yes | Yes | Yes | Yes | Yes | Yes | Yes | 7 (87.5%) | Low risk |
| Reinfeld et al., 2021                      | Yes | Yes | Yes | Yes | Yes | Yes | Yes | Yes | 8 (100%)  | Low risk |
| Grover et al., 2022                        | No  | Yes | Yes | Yes | Yes | Yes | Yes | Yes | 7 (87.5%) | Low risk |
| Lien et al., 2022                          | No  | Yes | Yes | Yes | Yes | Yes | Yes | Yes | 7 (87.5%) | Low risk |
| Takata et al., 2021                        | Yes | Yes | Yes | Yes | Yes | Yes | Yes | Yes | 8 (100%)  | Low risk |
| Roberts et al., 2021                       | Yes | Yes | Yes | Yes | Yes | Yes | Yes | Yes | 8 (100%)  | Low risk |
| Renemane et al., 2022                      | Yes | Yes | Yes | Yes | Yes | Yes | Yes | Yes | 8 (100%)  | Low risk |
| Alphonso et al., 2022                      | Yes | Yes | Yes | Yes | Yes | Yes | Yes | Yes | 8 (100%)  | Low risk |
| Aljeshi et al., 2022                       | No  | Yes | Yes | Yes | No  | Yes | Yes | Yes | 6 (75%)   | Low risk |
| Shukla et al., 2023                        | No  | Yes | Yes | Yes | Yes | Yes | Yes | Yes | 7 (87.5%) | Low risk |
| Fekih-Romdhane et al., 2023                | Yes | Yes | Yes | Yes | Yes | Yes | Yes | Yes | 8 (100%)  | Low risk |
| Krishna et al., 2022                       | Yes | Yes | Yes | Yes | Yes | Yes | Yes | Yes | 8 (100%)  | Low risk |
| Neves et al., 2023                         | No  | Yes | Yes | Yes | Yes | Yes | Yes | Yes | 7 (87.5%) | Low risk |
| Yadav et al., 2023                         | Yes | Yes | Yes | Yes | No  | Yes | Yes | Yes | 7 (87.5%) | Low risk |
| Chang et al., 2023                         | Yes | Yes | Yes | Yes | Yes | Yes | Yes | Yes | 8 (100%)  | Low risk |
| Al-Mashdali et al., 2021                   | Yes | Yes | Yes | Yes | Yes | Yes | Yes | Yes | 8 (100%)  | Low risk |
| Simanungkalit et al., 2022                 | No  | Yes | Yes | Yes | Yes | Yes | Yes | Yes | 7 (87.5%) | Low risk |
| Kita et al., 2023                          | Yes | Yes | Yes | Yes | Yes | Yes | Yes | Yes | 8 (100%)  | Low risk |
| Laxmi & Grover, 2023                       | Yes | Yes | Yes | Yes | Yes | Yes | Yes | Yes | 8 (100%)  | Low risk |
| <b>Abbreviations:</b><br>ROB, Risk of bias |     |     |     |     |     |     |     |     |           |          |

**Supplementary Table 2.** JBI Critical Appraisal Checklist for Case Series

| Reference                                                                    |  | Q1  | Q2  | Q3  | Q4 | Q5 | Q6  | Q7  | Q8  | Q9 | Q10 | Total (%) | ROB           |
|------------------------------------------------------------------------------|--|-----|-----|-----|----|----|-----|-----|-----|----|-----|-----------|---------------|
| Yesilkaya et al., 2021                                                       |  | Yes | Yes | Yes | UC | UC | Yes | Yes | Yes | No | NA  | 6 (60%)   | Moderate risk |
| Borovina et al., 2022                                                        |  | Yes | Yes | Yes | UC | UC | No  | Yes | Yes | No | NA  | 5 (50%)   | Moderate risk |
| <b>Abbreviations:</b><br>NA, not applicable; ROB, Risk of bias; UC, unclear. |  |     |     |     |    |    |     |     |     |    |     |           |               |
